# Supplementary material for: Cyclometallated Pt(ii) and Pd(ii) complexes with a trithiacrown ligand
Source: Royal Society of Chemistry journal article supplement (doi:10.1039/b717910c), 2008-01-01

## Experimental Supplemental Information

### "Cyclometallated Pt<sup>II</sup> and Pd<sup>II</sup> Complexes with a Trithiacrown Ligand"

Daron E. Janzen, Donald G. VanDerveer, Larry F. Mehne, Demétrio A. da Silva Filho, Jean-Luc Brédas, Gregory J. Grant

#### 1. Electrochemical Data

A. Cyclic voltammograms of [Pd([9]aneS<sub>3</sub>)(ppy)](PF<sub>6</sub>) (**1**) (solid line) and [Pd([9]aneS<sub>3</sub>)(bzq)](PF<sub>6</sub>) (**2**) (dotted line). Measured in MeCN at 2 mM in 0.1 M TBABF<sub>4</sub> using a Pt disk working electrode.

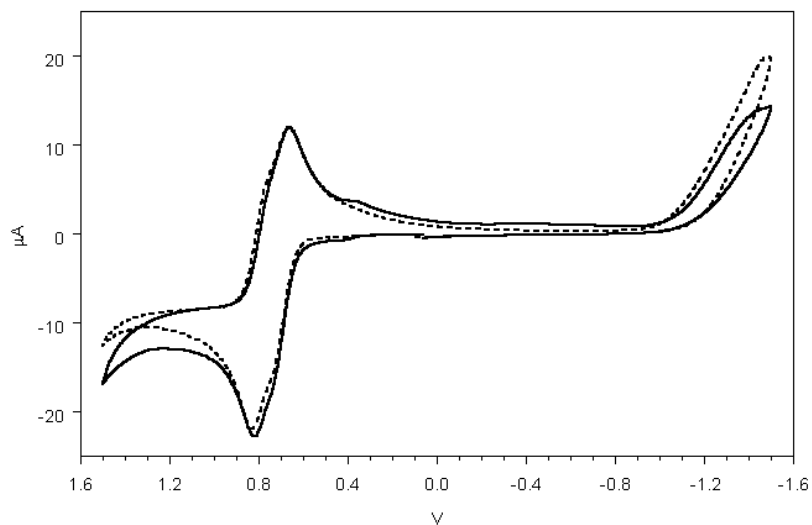

**B.** Cyclic voltammogram of  $[\text{Pt}([\text{9}]\text{aneS}_3)(\text{bzq})](\text{PF}_6)$ . Measured in MeCN at 2 mM in 0.1 M TBABF<sub>4</sub> using a Pt disk working electrode.

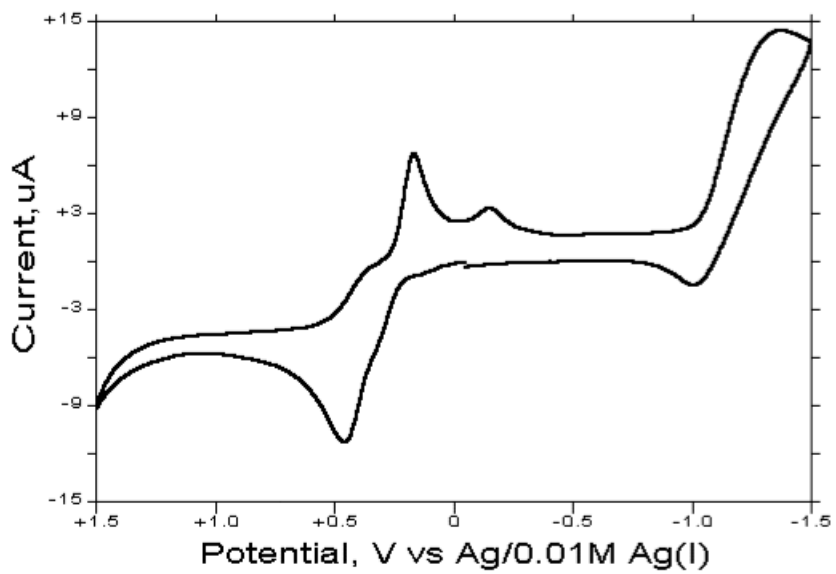

## 2. DFT Calculations

### a. $[\text{Pt}(\text{[9]aneS}_3)_2]^{2+}$

HOMO

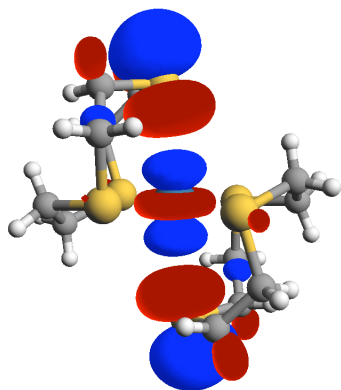

HOMO at 90°

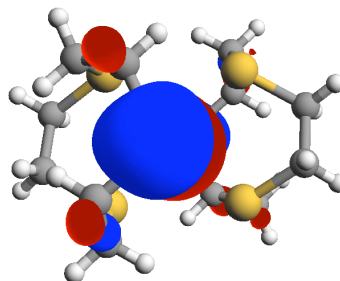

LUMO

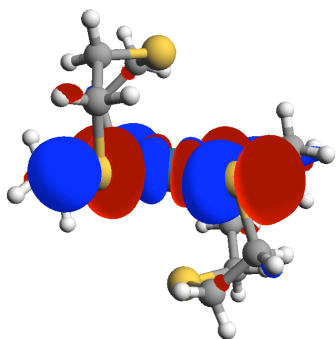

LUMO at 90°

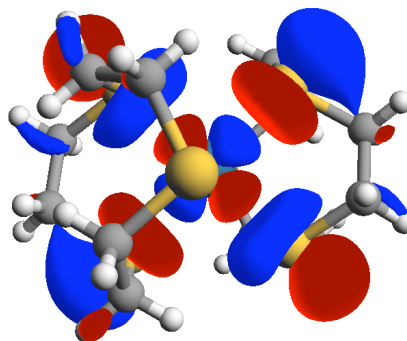

**b. [Pt([9]aneS<sub>3</sub>)(bipy)]<sup>2+</sup>**

**HOMO**

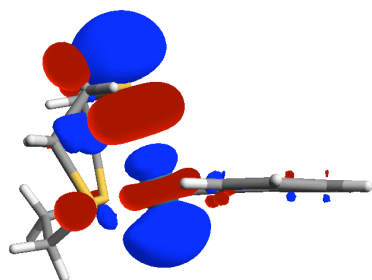

**HOMO at 90°**

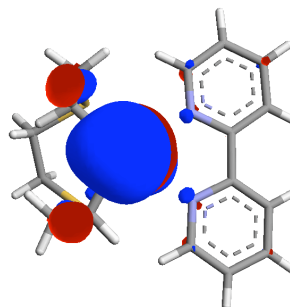

**LUMO**

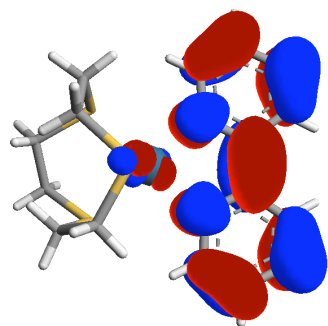

**LUMO at 90°**

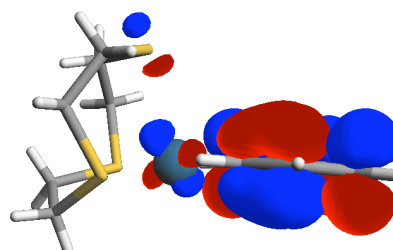

### C. Intermolecular Packing Motifs, $\pi$ - $\pi$ Stacking Shown by Pt(II) and Pd(II) [9]aneS<sub>3</sub> Complexes with Diimine and Cyclometallating Ligands.

**Stacking Motif A.** Alternating *in-in* and *out-out* layers. Stacking is shown for Complex **2**, [Pd([9]aneS<sub>3</sub>)(bzq)](PF<sub>6</sub>). The  $\pi$ -stacking distances between bzq ligands are 3.20 Å for the shorter *out-out* orientation and 3.41 Å for the longer *in-in* orientation.

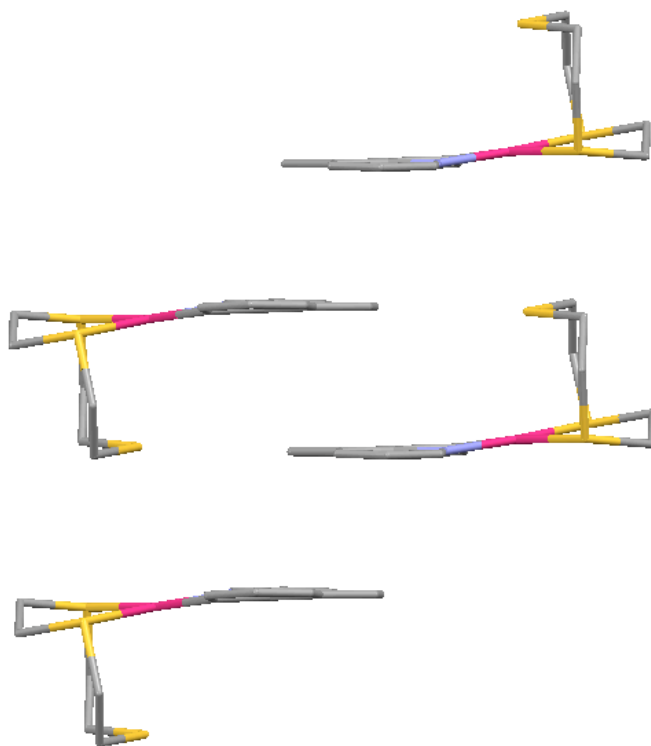

**Stacking Motif B.** Non-parallel layers. Stacking for Compound **1**,  $[\text{Pd}([\text{9}]\text{aneS}_3)(\text{ppy})](\text{PF}_6)$ , is shown. Angles between adjacent ppy planes are  $9.5^\circ$

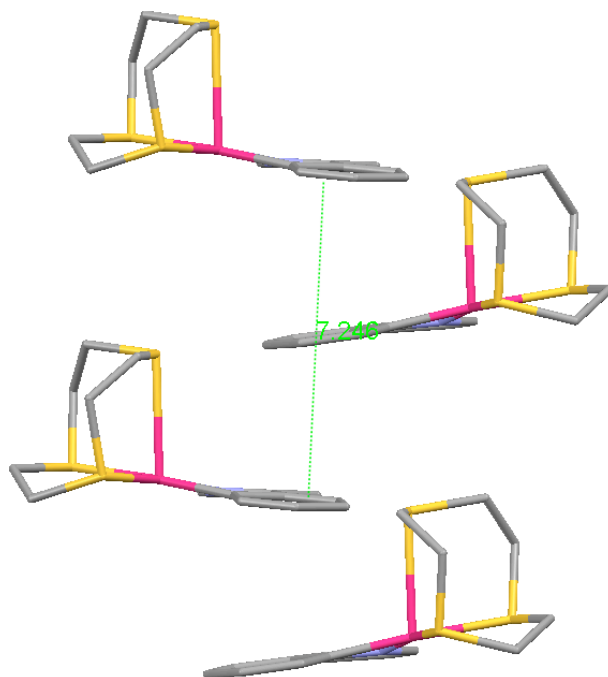

**Stacking Motif C.** Isolated dimers; may be either *out-out* or *in-in*

*Out-out* dimer for Complex **3**, [Pt([9]aneS<sub>3</sub>)(bzq)](PF<sub>6</sub>), is shown.

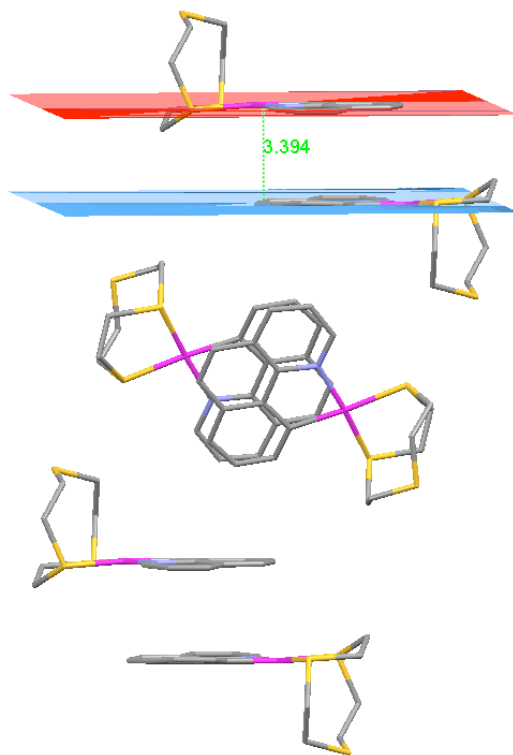

Supplement: b717910c.pdf [file b717910c.pdf]
